## Telemedicine to Address Inequities in Access to Primary Health Care for Minority Groups: A protocol for a Systematic Review and Meta-Analysis

Gabriela de Oliveira Laguna Silva<sup>1</sup>, Gabriel Ricardo Fernandes<sup>1</sup>, Emmanuelle Moreira Pereira<sup>1</sup>, Jacqueline Castro da Rocha<sup>1</sup>, Gabriela Tizianel Aguiar<sup>1</sup>, Tiago Sigal Linhares<sup>1,2</sup>, Andressa Dutra Dode<sup>1</sup>, Felipe Cezar Cabral<sup>1</sup>, Taís de Campos Moreira<sup>1</sup>, Maria Eulália Vinadé Chagas<sup>1</sup>

### **Affiliations:**

<sup>1</sup>Responsabilidade Social, Hospital Moinhos de Vento, Porto Alegre, BR

<sup>2</sup>Programa de residência, Hospital de Clínicas de Porto Alegre

### **Corresponding author:**

Gabriela de Oliveira Laguna Silva, Responsabilidade Social, Hospital Moinhos de Vento, Rua Ramiro Barcelos, 748, Porto Alegre, Rio Grande do Sul, Brazil.

Email:[gabriela.silva@hmv.org.br](mailto:gabriela.silva@hmv.org.br)

**Acknowledgments:** Francieli Ariane Lehnen Muck, librarian at FAMED/UFRGS, for her support in the literature search.

**Conflict of Interest:**The authors declare that there is no conflict of interest.

**Funding:** Provided by the Brazilian Ministry of Health, through the Institutional Development Program of the Brazilian National Health System (PROADI-SUS).

**Systematic review registration:** PROSPERO CRD42024581305

## Abstract

**Background:** The present article outlines the protocol for a systematic review and meta-analysis aimed at consolidating the available evidence on how telemedicine can reduce inequities in access to Primary Health Care (PHC) among minority populations. The review seeks to identify barriers, facilitators, and factors that influence the effectiveness of this intervention across different settings.

**Methods:** This protocol for a systematic review and meta-analysis is reported in line with Prisma-P and the results will be reported using PRISMA-E flowchart. The eligibility criteria was defined using the PICOS approach. Population is minority groups that have used telemedicine, the intervention is synchronous and asynchronous telemedicine, the comparator will consist of minority groups that have received usual care, outcome is access to primary health care and we will include randomized controlled trials. We will search MEDLINE (via PubMed), Scopus, Latina American and Caribbean Health Sciences Literature (LILACS) databases. The risk of bias will be assessed using the ROBINS-I and the confidence in cumulative evidence will be assessed using the GRADE equity tool.

**Discussion:** It is expected to provide pragmatic results, such supporting decision-making regarding the creation and implementation of new public policies, the development of clinical guidelines, and the optimization of resources aimed at equitable access.

**Systematic review registration:** PROSPERO CRD42024581305

**Keywords:** Health inequalities, telemedicine, primary health care, low- and middle-income countries, developed countries, Systematic review, Meta-analysis.

## **Background:**

Primary Health Care (PHC) is fundamental to the health system, acting as the initial point of contact for individuals with health services and playing a vital role in advancing health equity<sup>1</sup>. As one of the pillars of healthcare systems, PHC provides continuous, comprehensive, and accessible care, which is essential not only for disease prevention and health promotion but also for the management of chronic conditions<sup>1</sup>. However, despite its importance, minority groups in various regions face significant barriers that limit their access to these essential services. These health inequities are often reflected in disparities in social determinants of health (SDH) such as place of residence, race/ethnicity, occupation, gender, religion, education, socioeconomic status, and social capital framework<sup>2,3</sup>.

In low and middle-income countries (LMIC), these inequities are particularly pronounced, where many populations face severe barriers to accessing quality healthcare services<sup>2,4</sup>. For instance, in rural or remote areas, for instance, the shortage of healthcare professionals and the distance to health care centers make access to Primary Health Care (PHC) even more challenging. Additionally, economic and social factors exacerbate these disparities, leading to worse health outcomes for these populations<sup>3,4</sup>.

In this context, telemedicine has emerged as a promising tool to mitigate healthcare access, offering viable solutions to overcome geographical and socioeconomic barriers by providing remote healthcare services via digital technologies<sup>1</sup>. This is especially relevant in rural areas, where physical access to healthcare is limited. Furthermore, telemedicine has the potential to reduce linguistic and cultural barriers, improving communication and adherence to treatment among patients<sup>2</sup>.

As telemedicine becomes increasingly relevant on the global stage, it is crucial to understand its impact on health inequities and how it can be optimized to benefit the most vulnerable populations<sup>1,5</sup>. Marginalized populations, such as Indigenous populations, LGBTQIAP+ individuals, homeless populations, people with disabilities, Quilombolas populations, Black populations, incarcerated populations, and those reentering society from the prison system, face even greater barriers to accessing healthcare. These populations often do not benefit equally from

technological advancements in health due to the stratifying social forces present in societies<sup>2,4,6</sup>.

The Pan American Health Organization (PAHO) highlights that telemedicine can improve access and timeliness in the delivery of healthcare services, particularly benefiting populations that face significant challenges in accessing these services<sup>5</sup>. Telemedicine should be seen as a pathway. One of the greatest challenges in its evaluation is the lack of knowledge and proper use, which limits the development of reliable indicators. Given the current shortage of evaluation tools, it is essential that assessments focus on demonstrating the comparative advantages of telemedicine over traditional healthcare practices that do not incorporate technology<sup>7</sup>. While telemedicine is widely promoted as a means to enhance healthcare access, evidence of its effectiveness in reducing health inequities remains fragmented and sparse<sup>1,6</sup>. As a result, the current synthesis of evidence reveals significant gaps in understanding how to effectively address these inequities.<sup>3</sup>

This review is necessary to explore the impact of telemedicine across various contexts, especially for populations that have historically encountered substantial barriers to healthcare access. The goal is to consolidate the available evidence on how telemedicine can help reduce inequities in access to Primary Health Care (PHC) among minority populations, identifying barriers, facilitators, and factors that affect the effectiveness of this intervention in different settings.

## **Methods:**

This protocol for a systematic review and meta-analysis is reported in line with Preferred Reporting Items for Systematic Reviews and Meta-analysis Protocols (PRISMA-P)<sup>8</sup> (Supplemental material 1). Details of this protocol were registered in the International Prospective Register of Systematic Reviews (PROSPERO) and can be accessed at PROSPERO<sup>9</sup>. We aimed to conclude and publish this systematic review in the first semester of 2025. Any changes to the protocol will be made on the PROSPERO.

### Eligibility criteria

The eligibility criteria was defined using Population, Intervention, Comparator, Outcomes and Study design (PICOS) approach.

### Population

We will consider studies on minority group, as:

1. indigenous population
2. LGBTQIAP+ population (Lesbian, Gay, Bi, Trans, Queer, intersex, asexual/agender/aromantic, Pan/Poly, Non-binary, and more)
3. Homeless population
4. People with disabilities
5. Quilombola population
6. Black population
7. Incarcerated population
8. Formerly incarcerated individuals

### Intervention

The intervention will be the use of synchronous and asynchronous telemedicine.

### Comparators

The comparator will consist of minority groups that have received usual care (face-to-face consultation).

### Outcomes

We will consider studies that bring information about access to primary health care.

### Studies design

We will include randomized controlled trials.

### Report characteristics

There will be no language or date restrictions. Gray literature and conference abstracts will be excluded.

### Information sources

We will search the following electronic bibliographic databases: MEDLINE (via PubMed), Scopus, Latina American and Caribbean Health Sciences Literature

(LILACS). The references of the selected articles will be manually screened to identify potential studies that were not retrieved by the search strategy.

### Search strategy

The search strategy was developed in collaboration with a librarian to ensure it was comprehensive and accurate. First, the strategy was designed for the PubMed database and, after being reviewed and approved, it was adapted for other databases, Scopus and LILACS. The strategy was structured according to the PICO framework, and to capture populations exposed to social determinants of health but not explicitly identified as minority groups, we incorporated the terms "minority group" AND "inequities." Boolean operators, indexed database terms, and free-text terms were utilized to optimize the search for relevant studies across all targeted databases (Supplemental Material 2). This comprehensive approach ensured that all pertinent literature was included, broadening the scope of the review to encompass studies addressing both minority groups and inequities related to healthcare access.

### Study records

#### Data management

The records retrieved from the databases will be imported into Rayyan©, an online systematic review tool<sup>10</sup>. Reviewers will have access to a shared Rayyan© account so that they can read the abstracts of retrieved studies.

#### Selection process

Two groups of independent reviewers will be randomly formed (Group 1: EP, GF, AD e MC e Group 2: GL, GT, TL e JR) to assess the titles, keywords and abstracts of the retrieved articles using Rayyan. If the eligibility cannot be determined, the articles will be classified as eligible for the full-text review stage. A third reviewer (TM) will be responsible for reaching consensus on articles with discrepant evaluations between the reviewer groups.

#### Data collection process

The relevant information will be collected independently by both groups of reviewers from each eligible study and transcribed into a Google Sheets spreadsheet.

### Data items

The information that will be extracted from the eligible studies and transcribed into a Google Sheets spreadsheet includes: year of publication, country where the study was conducted, study characteristics, sample size, demographic information of participants, information of PROGRESS-Plus to identify the social determinants of health, telemedicine characteristics, results, and conclusions.

### Outcomes and prioritization

The primary outcome is the access to primary health care, defined as the individual's ability to obtain basic and essential health services that meet their health needs, which includes availability, accessibility, accommodation, affordability and acceptability<sup>11</sup>. The additional outcomes are the quality/effectiveness of access for users from low- and middle-income countries compared to developed countries, and the impact of telemedicine overuse on clinical outcomes.

### Risk of bias in individual studies

Two groups of independent reviewers (Group 1: EP, GF, AD e MC e Group 2: GL, GT, TL e JR) will assess the risk of bias using the ROBINS-I<sup>12</sup> tool in non-randomized Studies of interventions.

### Data synthesis

The study selection description will be done using a PRISMA-E<sup>13</sup> flowchart. All included studies will have qualitative and quantitative data related to the research question extracted and synthesized. If there is sufficient and appropriate data, meta-analyses will be conducted for the groups of interest.

### Meta-bias(es)

Funnel plots will be generated and visually examined for asymmetry, which may suggest the presence of publication bias<sup>14</sup>. When the meta-analysis includes 10 or more studies, the Egger test will be performed to assess funnel plots asymmetry<sup>14</sup>.

### Confidence in cumulative evidence

Two groups of independent reviewers (Group 1: EP, GF, AD e MC e Group 2: GL, GT, TL e JR) will independently assess the quality of evidence for all outcomes using

the Grading of Recommendations Assessment, Development and Evaluation (GRADE) equity approach<sup>15</sup>. Conclusions regarding GRADE for each outcome will be presented in a Summary of Findings table. An overall GRADE will be assigned to the set of all outcomes.

### **Discussion:**

This article is a protocol to guide a systematic review which will synthesize the existing literature on access to the primary health care for minority groups through telemedicine. It aims to provide pragmatic outcomes, such as supporting decision-making regarding the creation and implementation of new public policies, the development of clinical guidelines, and resource optimization to promote equitable access. It is understood that some limitations may arise throughout the work, such as insufficient studies for certain minority groups. However, there are several relevant aspects, such as the use of an established methodology and guidelines in conducting the study, the publication of the current protocol, and registration in PROSPERO, aiming for transparency and reproducibility. The results will be published in a peer-reviewed journal.



## References:

1. Hanson K, Balabanova D, Brikci N, Erlangga D, Powell-Jackson T. Financing primary health care in low- and middle-income countries: A research and policy agenda. *J Health Serv Res Policy*. 2023;28(1):1-3. doi:10.1177/13558196221135741
2. O'Neill J, Tabish H, Welch V, et al. Applying an equity lens to interventions: using PROGRESS ensures consideration of socially stratifying factors to illuminate inequities in health. *J Clin Epidemiol*. 2014;67(1):56-64. doi:10.1016/j.jclinepi.2013.08.005
3. Petticrew M, Tugwell P, Kristjansson E, Oliver S, Ueffing E, Welch V. Damned if you do, damned if you don't: subgroup analysis and equity. *J Epidemiol Community Health*. 2012;66(1):95-98. doi:10.1136/jech.2010.121095
4. Gnanvi JE, Yanchar N, Freire G, et al. Social determinants of health and disparities in pediatric trauma care: protocol for a systematic review and meta-analysis. *Syst Rev*. 2024;13(1):94. doi:10.1186/s13643-024-02510-7
5. Pan American Health Organization. eHealth Conversations. Using Information Management, Dialogue, and Knowledge Exchange to Move Toward Universal Access to Health. Published online 2016. <https://iris.paho.org/handle/10665.2/28392>
6. Funnell S, Jull J, Mbuagbaw L, et al. Improving social justice in observational studies: protocol for the development of a global and Indigenous STROBE-equity reporting guideline. *Int J Equity Health*. 2023;22(1):55. doi:10.1186/s12939-023-01854-1
7. Pan American Health Organization. Strategy and Plan of Action on Health Promotion within the Context of the Sustainable Development Goals 2019-2030. Published online 2022. <https://iris.paho.org/handle/10665.2/55925>
8. Moher D, Clarke M, Gherzi D, et al. Preferred reporting items for systematic review and meta-analysis protocols (PRISMA-P) 2015 statement. *Syst Rev*. 2015;4(1):1. doi:10.1186/2046-4053-4-1
9. Silva G de OL, Aguilar GT, Dode AD, et al. Telemedicine to Address Inequities in Access to Primary Health Care by Minority Group: Systematic Review and Meta-Analysis. Published online September 1, 2024.

- [https://www.crd.york.ac.uk/prospero/display\\_record.php?ID=CRD42024581305](https://www.crd.york.ac.uk/prospero/display_record.php?ID=CRD42024581305)
10. Ouzzani M, Hammady H, Fedorowicz Z, Elmagarmid A. Rayyan—a web and mobile app for systematic reviews. *Syst Rev*. 2016;5(1):210. doi:10.1186/s13643-016-0384-4
  11. Penchansky R, Thomas JW. The Concept of Access: Definition and Relationship to Consumer Satisfaction. *Med Care*. 1981;19(2):127-140. doi:10.1097/00005650-198102000-00001
  12. Sterne JAC, Hernán MA, Reeves BC, et al. ROBINS-I: a tool for assessing risk of bias in non-randomized studies of interventions. *BMJ*. 2016;355:i4919. doi:10.1136/bmj.i4919.
  13. Welch V, Petticrew M, Tugwell P, et al. PRISMA-Equity 2012 Extension: Reporting Guidelines for Systematic Reviews with a Focus on Health Equity. *PLoS Med*. 2012;9(10):e1001333. doi:10.1371/journal.pmed.1001333
  14. Page MJ, Higgins JPT, Sterne JAC. Assessing risk of bias due to missing results in a synthesis. In: *Cochrane Handbook for Systematic Reviews of Interventions*. Version 6.4 (updated August 2023). Cochrane; 2023. [www.training.cochrane.org/handbook](http://www.training.cochrane.org/handbook)
  15. Eslava-Schmalbach J, Mosquera P, Alzate JP, et al. Considering health equity when moving from evidence-based guideline recommendations to implementation: a case study from an upper-middle income country on the GRADE approach. *Health Policy Plan*. 2017;32(10):1484-1490. doi:10.1093/heapol/czx126

Telemedicine to Address Inequities in Access to Primary Health Care for Minority Groups: A protocol for a Systematic Review and Meta-Analysis

Gabriela de Oliveira Laguna Silva<sup>1</sup>, Gabriel Ricardo Fernandes<sup>1</sup>, Emmanuelle Moreira Pereira<sup>1</sup>, Jacqueline Castro da Rocha<sup>1</sup>, Gabriela Tizianel Aguilar<sup>1</sup>, Tiago Sigal Linhares<sup>1,2</sup>, Andressa Dutra Dode<sup>1</sup>, Felipe Cezar Cabral<sup>1</sup>, Taís de Campos Moreira<sup>1</sup>, Maria Eulália Vinadé Chagas<sup>1</sup>

**Affiliations:**

<sup>1</sup>Responsabilidade Social, Hospital Moinhos de Vento, Porto Alegre, BR

<sup>2</sup>Programa de residência, Hospital de Clínicas de Porto Alegre

**Corresponding author:**

Gabriela de Oliveira Laguna Silva, Responsabilidade Social, Hospital Moinhos de Vento, Rua Ramiro Barcelos, 748, Porto Alegre, Rio Grande do Sul, Brazil. Email: [gabriela.silva@hmv.org.br](mailto:gabriela.silva@hmv.org.br)

**Acknowledgments:** Francieli Ariane Lehnen Muck, librarian at FAMED/UFRGS, for her support in the literature search.

**Conflict of Interest:** The authors declare that there is no conflict of interest.

**Funding:** Provided by the Brazilian Ministry of Health, through the Institutional Development Program of the Brazilian National Health System (PROADI-SUS).

**Systematic review registration:** PROSPERO CRD42024581305

## PRISMA-P 2015 Checklist

This checklist has been adapted for use with protocol submissions to *Systematic Reviews* from Table 3 in Moher D et al: Preferred reporting items for systematic review and meta-analysis protocols (PRISMA-P) 2015 statement. *Systematic Reviews* 2015 4:1

| Section/topic                     | #  | Checklist item                                                                                                                                                                                  | Information reported                |                          | Line number(s) |
|-----------------------------------|----|-------------------------------------------------------------------------------------------------------------------------------------------------------------------------------------------------|-------------------------------------|--------------------------|----------------|
|                                   |    |                                                                                                                                                                                                 | Yes                                 | No                       |                |
| <b>ADMINISTRATIVE INFORMATION</b> |    |                                                                                                                                                                                                 |                                     |                          |                |
| <b>Title</b>                      |    |                                                                                                                                                                                                 |                                     |                          |                |
| Identification                    | 1a | Identify the report as a protocol of a systematic review                                                                                                                                        | <input checked="" type="checkbox"/> | <input type="checkbox"/> | Title page     |
| Update                            | 1b | If the protocol is for an update of a previous systematic review, identify as such                                                                                                              | <input type="checkbox"/>            | <input type="checkbox"/> | N/A            |
| <b>Registration</b>               | 2  | If registered, provide the name of the registry (e.g., PROSPERO) and registration number in the Abstract                                                                                        | <input checked="" type="checkbox"/> | <input type="checkbox"/> | 22             |
| <b>Authors</b>                    |    |                                                                                                                                                                                                 |                                     |                          |                |
| Contact                           | 3a | Provide name, institutional affiliation, and e-mail address of all protocol authors; provide physical mailing address of corresponding author                                                   | <input checked="" type="checkbox"/> | <input type="checkbox"/> | Title page     |
| Contributions                     | 3b | Describe contributions of protocol authors and identify the guarantor of the review                                                                                                             | <input checked="" type="checkbox"/> | <input type="checkbox"/> | Title page     |
| <b>Amendments</b>                 | 4  | If the protocol represents an amendment of a previously completed or published protocol, identify as such and list changes; otherwise, state plan for documenting important protocol amendments | <input type="checkbox"/>            | <input type="checkbox"/> | N/A            |
| <b>Support</b>                    |    |                                                                                                                                                                                                 |                                     |                          |                |
| Sources                           | 5a | Indicate sources of financial or other support for the review                                                                                                                                   | <input checked="" type="checkbox"/> | <input type="checkbox"/> | Title page     |
| Sponsor                           | 5b | Provide name for the review funder and/or sponsor                                                                                                                                               | <input checked="" type="checkbox"/> | <input type="checkbox"/> | Title page     |
| Role of sponsor/funder            | 5c | Describe roles of funder(s), sponsor(s), and/or institution(s), if any, in developing the protocol                                                                                              | <input checked="" type="checkbox"/> | <input type="checkbox"/> | Title page     |
| <b>INTRODUCTION</b>               |    |                                                                                                                                                                                                 |                                     |                          |                |
| <b>Rationale</b>                  | 6  | Describe the rationale for the review in the context of what is already known                                                                                                                   | <input checked="" type="checkbox"/> | <input type="checkbox"/> | 74-76          |
| <b>Objectives</b>                 | 7  | Provide an explicit statement of the question(s) the review will address with reference to                                                                                                      | <input checked="" type="checkbox"/> | <input type="checkbox"/> | 76-79          |

| Section/topic                             | #   | Checklist item                                                                                                                                                                                                                              | Information reported                |                          | Line number(s) |
|-------------------------------------------|-----|---------------------------------------------------------------------------------------------------------------------------------------------------------------------------------------------------------------------------------------------|-------------------------------------|--------------------------|----------------|
|                                           |     |                                                                                                                                                                                                                                             | Yes                                 | No                       |                |
|                                           |     | participants, interventions, comparators, and outcomes (PICO)                                                                                                                                                                               |                                     |                          |                |
| <b>METHODS</b>                            |     |                                                                                                                                                                                                                                             |                                     |                          |                |
| <b>Eligibility criteria</b>               | 8   | Specify the study characteristics (e.g., PICO, study design, setting, time frame) and report characteristics (e.g., years considered, language, publication status) to be used as criteria for eligibility for the review                   | <input checked="" type="checkbox"/> | <input type="checkbox"/> | 90-118         |
| <b>Information sources</b>                | 9   | Describe all intended information sources (e.g., electronic databases, contact with study authors, trial registers, or other grey literature sources) with planned dates of coverage                                                        | <input checked="" type="checkbox"/> | <input type="checkbox"/> | 124-128        |
| <b>Search strategy</b>                    | 10  | Present draft of search strategy to be used for at least one electronic database, including planned limits, such that it could be repeated                                                                                                  | <input checked="" type="checkbox"/> | <input type="checkbox"/> | 130-141        |
| <b>STUDY RECORDS</b>                      |     |                                                                                                                                                                                                                                             |                                     |                          |                |
| Data management                           | 11a | Describe the mechanism(s) that will be used to manage records and data throughout the review                                                                                                                                                | <input checked="" type="checkbox"/> | <input type="checkbox"/> | 144-147        |
| Selection process                         | 11b | State the process that will be used for selecting studies (e.g., two independent reviewers) through each phase of the review (i.e., screening, eligibility, and inclusion in meta-analysis)                                                 | <input checked="" type="checkbox"/> | <input type="checkbox"/> | 149-155        |
| Data collection process                   | 11c | Describe planned method of extracting data from reports (e.g., piloting forms, done independently, in duplicate), any processes for obtaining and confirming data from investigators                                                        | <input checked="" type="checkbox"/> | <input type="checkbox"/> | 157-159        |
| <b>Data items</b>                         | 12  | List and define all variables for which data will be sought (e.g., PICO items, funding sources), any pre-planned data assumptions and simplifications                                                                                       | <input checked="" type="checkbox"/> | <input type="checkbox"/> | 161-166        |
| <b>Outcomes and prioritization</b>        | 13  | List and define all outcomes for which data will be sought, including prioritization of main and additional outcomes, with rationale                                                                                                        | <input checked="" type="checkbox"/> | <input type="checkbox"/> | 168-174        |
| <b>Risk of bias in individual studies</b> | 14  | Describe anticipated methods for assessing risk of bias of individual studies, including whether this will be done at the outcome or study level, or both; state how this information will be used in data synthesis                        | <input checked="" type="checkbox"/> | <input type="checkbox"/> | 176-179        |
| <b>DATA</b>                               |     |                                                                                                                                                                                                                                             |                                     |                          |                |
| <b>Synthesis</b>                          | 15a | Describe criteria under which study data will be quantitatively synthesized                                                                                                                                                                 | <input checked="" type="checkbox"/> | <input type="checkbox"/> | 181-185        |
|                                           | 15b | If data are appropriate for quantitative synthesis, describe planned summary measures, methods of handling data, and methods of combining data from studies, including any planned exploration of consistency (e.g., $I^2$ , Kendall's tau) | <input checked="" type="checkbox"/> | <input type="checkbox"/> | 181-185        |
|                                           | 15c | Describe any proposed additional analyses (e.g., sensitivity or subgroup analyses, meta-                                                                                                                                                    | <input checked="" type="checkbox"/> | <input type="checkbox"/> | 181-185        |

| Section/topic                            | #   | Checklist item                                                                                                              | Information reported                |                          | Line number(s) |
|------------------------------------------|-----|-----------------------------------------------------------------------------------------------------------------------------|-------------------------------------|--------------------------|----------------|
|                                          |     |                                                                                                                             | Yes                                 | No                       |                |
|                                          |     | regression)                                                                                                                 |                                     |                          |                |
|                                          | 15d | If quantitative synthesis is not appropriate, describe the type of summary planned                                          | <input checked="" type="checkbox"/> | <input type="checkbox"/> | 181-185        |
| <b>Meta-bias(es)</b>                     | 16  | Specify any planned assessment of meta-bias(es) (e.g., publication bias across studies, selective reporting within studies) | <input checked="" type="checkbox"/> | <input type="checkbox"/> | 187-190        |
| <b>Confidence in cumulative evidence</b> | 17  | Describe how the strength of the body of evidence will be assessed (e.g., GRADE)                                            | <input checked="" type="checkbox"/> | <input type="checkbox"/> | 192-198        |

It is made available under a [CC-BY-ND 4.0 International license](https://creativecommons.org/licenses/by-nd/4.0/).

## Telemedicine to Address Inequities in Access to Primary Health Care for Minority Groups: A protocol for a Systematic Review and Meta-Analysis

Gabriela de Oliveira Laguna Silva<sup>1</sup>, Gabriel Ricardo Fernandes<sup>1</sup>, Emmanuelle Moreira Pereira<sup>1</sup>, Jacqueline Castro da Rocha<sup>1</sup>, Gabriela Tizianel Aguiar<sup>1</sup>, Tiago Sigal Linhares<sup>1,2</sup>, Andressa Dutra Dode<sup>1</sup>, Felipe Cezar Cabral<sup>1</sup>, Taís de Campos Moreira<sup>1</sup>, Maria Eulália Vinadé Chagas<sup>1</sup>

### **Affiliations:**

<sup>1</sup>Responsabilidade Social, Hospital Moinhos de Vento, Porto Alegre, BR

<sup>2</sup>Programa de residência, Hospital de Clínicas de Porto Alegre

### **Corresponding author:**

Gabriela de Oliveira Laguna Silva, Responsabilidade Social, Hospital Moinhos de Vento, Rua Ramiro Barcelos, 748, Porto Alegre, Rio Grande do Sul, Brazil.

Email:[gabriela.silva@hmv.org.br](mailto:gabriela.silva@hmv.org.br)

**Acknowledgments:** Francieli Ariane Lehnen Muck, librarian at FAMED/UFRGS, for her support in the literature search.

**Conflict of Interest:**The authors declare that there is no conflict of interest.

**Funding:** Provided by the Brazilian Ministry of Health, through the Institutional Development Program of the Brazilian National Health System (PROADI-SUS).

**Systematic review registration:** PROSPERO CRD42024581305

## Supplemental material 2

PubMed:

(Telemedicine[mh] OR Telemedicine[tiab] OR Virtual Medicine[tiab] OR Tele Referral\*[tiab] OR Mobile Health[tiab] OR mHealth[tiab] OR Telehealth[tiab] OR eHealth[tiab] OR Telecare[tiab] OR Tele Care[tiab])

AND

(Primary Health Care[mh] OR Primary Health Care[tiab] OR Primary Care[tiab] OR Primary Healthcare[tiab])

AND

(Indigenous Peoples[mh] OR Indigenous[tiab] OR First Nation People\*[tiab] OR Tribes[tiab] OR Native\*[tiab] OR Sexual and Gender Minorities[mh] OR Non Heterosexual\*[tiab] OR Sexual Dissident\*[tiab] OR GLBT[tiab] OR LGBT\*[tiab] OR Gender Diverse[tiab] OR LBG Person\*[tiab] OR Lesbigan[tiab] OR Sexual Minorit\*[tiab] OR Bisexual\*[tiab] OR Homosexual\*[tiab] OR Queer\*[tiab] OR Gays[tiab] OR Gay[tiab] OR Lesbian\*[tiab] OR Gender Minorit\*[tiab] OR Ill-Housed Persons[mh] OR Ill Housed Person\*[tiab] OR Shelterless Person\*[tiab] OR Homeless Person\*[tiab] OR Unhoused Person\*[tiab] OR Street People[tiab] OR Homelessness[tiab] OR Homeless Shelter\*[tiab] OR Disabled Persons[mh] OR Disabled Person\*[tiab] OR People with Disabilit\*[tiab] OR Handicapped[tiab] OR Physically Disabled[tiab] OR Physically Challenged[tiab] OR Quilombola[tiab] OR Black People[mh] OR Black\*[tiab] OR Negro\*[tiab] OR African Continental Ancestry Group[tiab] OR African American\*[tiab] OR Afro American\*[tiab] OR Prisoners[mh] OR Prisoner\*[tiab] OR Incarcerated Individual\*[tiab] OR Imprisoned Individual\*[tiab] OR Inmate\*[tiab] OR Hostage\*[tiab] OR Detained Person\*[tiab] OR Ex-Prisoner\*[tiab])

AND

(Health Inequities[mh] OR Health Equity[mh] OR Inequit\*[tiab] OR Inequalit\*[tiab] OR Disparit\*[tiab] OR Equit\*[tiab] OR Equalit\*[tiab] OR Disadvantage\*[tiab] OR Residence Characteristics[mh] OR Residence[tiab] OR Place of Birth[tiab] OR Birth Place[tiab] OR Communit\*[tiab] OR Residential[tiab] OR Domicile\*[tiab] OR Racial Groups[mh] OR Racial Group\*[tiab] OR Race\*[tiab] OR Ethnicity[mh] OR Ethnicity[tiab] OR Ethnic[tiab] OR Culture[mh] OR Culture[tiab] OR Customs[tiab] OR Language[mh] OR Language[tiab] OR Dialect\*[tiab] OR Employment[mh] OR Employment[tiab] OR Occupational Status[tiab] OR Labor Force\*[tiab] OR Underemployment[tiab] OR occupation\*[tiab] OR Gender Identity[mh] OR Gender[tiab] OR Religion[mh] OR Religio\*[tiab] OR Prayer\*[tiab] OR Education[mh] OR Educat\*[tiab] OR Socioeconomic Factors[mh] OR Social and Economic Factors[tiab] OR Economic and Social Factors[tiab] OR Socioeconomic[tiab] OR socio-economic[tiab] OR High Income Population\*[tiab] OR Land Tenure[tiab] OR Standard of Living[tiab] OR Living Standard\*[tiab] OR Social Capital[mh] OR Social Capital[tiab] OR Social Infrastructure\*[tiab])



Scopus:

TITLE-ABS-KEY(Telemedicine OR "Virtual Medicine" OR "Tele Referral\*" OR "Mobile Health" OR mHealth OR Telehealth OR eHealth OR Telecare OR "Tele Care")

AND

TITLE-ABS-KEY("Primary Health Care" OR "Primary Care" OR "Primary Healthcare")

AND

TITLE-ABS-KEY(Indigenous OR "First Nation People\*" OR Tribes OR Native\* OR "Non Heterosexual\*" OR "Sexual Dissident\*" OR GLBT OR LGBT\* OR "Gender Diverse" OR "LGB Person\*" OR Lesbian OR "Sexual Minorit\*" OR Bisexual\* OR Homosexual\* OR Queer\* OR Gays OR Gay OR Lesbian\* OR "Gender Minorit\*" OR "Ill Housed Person\*" OR "Shelterless Person\*" OR "Homeless Person\*" OR "Unhoused Person\*" OR "Street People" OR Homelessness OR "Homeless Shelter\*" OR "Disabled Person\*" OR "People with Disabilit\*" OR Handicapped OR "Physically Disabled" OR "Physically Challenged" OR Quilombola OR Black\* OR Negro\* OR "African Continental Ancestry Group" OR "African American\*" OR "Afro American\*" OR Prisoner\* OR "Incarcerated Individual\*" OR "Imprisoned Individual\*" OR Inmate\* OR Hostage\* OR "Detained Person\*" OR "Ex-Prisoner\*")

AND

TITLE-ABS-KEY(Inequit\* OR Inequalit\* OR Disparit\* OR Equit\* OR Equalit\* OR Disadvantage\* OR Residence OR "Place of Birth" OR "Birth Place" OR Communit\* OR Residential OR Domicile\* OR "Racial Group\*" OR Race\* OR Ethnicity OR Ethnic OR Culture OR Customs OR Language OR Dialect\* OR Employment OR "Occupational Status" OR "Labor Force\*" OR Underemployment OR occupation\* OR Gender OR Religio\* OR Prayer\* OR Educat\* OR "Social and Economic Factors" OR "Economic and Social Factors" OR Socioeconomic OR "socio-economic" OR "High Income Population\*" OR "Land Tenure" OR "Standard of Living" OR "Living Standard\*" OR "Social Capital" OR "Social Infrastructure\*")

Lilacs:

(mh:(H02.403.840\* OR L01.462.500.847.652\* OR N04.590.374.800\* OR SP2.840.065.715\* OR SP2.840.566\*) OR tw:(Telemedicin\* OR "Virtual Medicine" OR "Tele Referral" OR "Tele Referrals" OR "Mobile Health" OR mHealth OR Telehealth OR eHealth OR Telecare OR "Tele Care" OR "Ciber Saúde" OR Cibersaúde OR "Medicina 2.0" OR "Medicina Virtual" OR "Saúde 2.0" OR "Saúde Eletrônica" OR "e-Saúde" OR eSaúde OR mSaúde OR uSaúde OR "Tele-Serviços em Saúde" OR Teleassistência OR Telecuidado OR Telecura OR Telereferenciação OR Telessaúde OR Telesserviços OR eSalud OR mSalud OR uSalud OR "Ciber Salud" OR Cibersalud OR "Salud 2.0" OR "Salud Electrónica" OR "Salud Móvil" OR Telesalud OR "Tele Referencia" OR Teleasistencia OR Teleservicio\*))

AND

(mh:(N04.590.233.727\* OR SP2.630.121\*) OR tw:("Primary Health Care" OR "Primary Care" OR "Primary Healthcare" OR "Atendimento Básico" OR "Atendimento Primário" OR "Atenção Básica" OR "Atenção Primária" OR "Cuidado Primário" OR "Cuidado de Saúde Primário" OR "Cuidados Primários" OR "Cuidados de Saúde Primários" OR "Primeiro Nível de Assistência" OR "Primeiro Nível de Atendimento" OR "Primeiro Nível de Atenção" OR "Primeiro Nível de Cuidado" OR "Primeiro Nível de Cuidados" OR "Asistencia Primaria" OR "Atención Básica" OR "Atención Primaria" OR "Atención Sanitaria de Primer Nivel" OR "Primer Nivel de Asistencia" OR "Primer Nivel de Atención" OR "Primer Nivel de la Asistencia" OR "Asistencia Sanitaria de Primer Nivel"))

AND

(mh:(M01.270.968\* OR SP3.522.561.162.267.602\* OR M01.270.988\* OR SP3.522.561.162.300.451\* OR M01.325\* OR M01.150\* OR SP3.522.561.162.267.713\* OR M01.686.372\* OR M01.729\*) OR tw:(Indigenous OR "First Nation People" OR "First Nation Peoples" OR Tribes OR Nativ\* OR Indígena\* OR Aborigen\* OR "Non Heterosexual" OR "Non Heterosexuals" OR "Sexual Dissident" OR "Sexual Dissidents" OR GLBT OR LGBT\* OR "Gender Diverse" OR "LGB Persons" OR "LGB Person" OR Lesbigay OR "Sexual Minority" OR "Sexual Minorities" OR Bisexual\* OR Homosexual\* OR Queer\* OR Gays OR Gay OR Lesbian\* OR "Gender Minorities" OR "Gender Minority" OR Homossex\* OR Lésbic\* OR Bissex\* OR Transex\* OR Intersexuais OR Assexuais OR "Minorias Sexuais" OR "Minorias de Gênero" OR "Pessoas LGB" OR "não Heterossexuais" OR Gais OR "Género Diverso" OR "Minorías Sexuales" OR "Personas LBG" OR "no Heterossexuales" OR "Ill Housed Person" OR "Ill Housed Persons" OR "Shelterless Person" OR "Shelterless Persons" OR "Homeless Person" OR "Homeless Persons" OR "Unhoused Person" OR "Unhoused Persons" OR "Street People" OR Homelessness OR "Homeless Shelter" OR "Homeless Shelters" OR "Morador de Rua" OR "Moradores de Rua" OR "Pessoas em Situação de Rua" OR "Pessoas sem Lar" OR "População em Situação de Rua" OR "Sem-Teto" OR "Personas en Situación de Calle" OR "Personas sin Hogar" OR "Personas sin Refugio" OR "Sin Techo" OR Sintecho OR "Disabled Person" OR "Disabled Persons" OR "People with

Disability" OR "Persons with Disabilities" OR Handicapped OR "Physically Disabled" OR "Physically Challenged" OR Deficienc\* OR Cadeirant\* OR "Usuário de Cadeira de Rodas" OR Discapacidad\* OR Quilomb\* OR Cumbes OR Marroons OR Mocambos OR Palenques OR Black\* OR Negr\* OR "African Continental Ancestry Group" OR "African American" OR "African Americans" OR "Afro American" OR "Afro Americans" OR Afrodescendent\* OR "Grupo com Ancestrais Africanos Continentais" OR "Grupo com Ancestrais do Continente Africano" OR "Grupo de Ancestralidade no Continente Africano" OR "Grupo de Ascendência Continental Africana" OR "Grupos Étnicos da África" OR "Ascendência Africana" OR Afrodescendent\* "Etnias de África" OR "Grupo de Ancestro Africano Continental" OR "Grupo de Ascendencia Continental Africana" OR "Afro-Americano" OR "Afro-Americanos" OR "Africano Americano" OR "Africanos-Americanos" OR Afroamericano\* OR Prisoner\* OR "Incarcerated Individual" OR "Incarcerated Individuals" OR "Imprisoned Individual" OR "Imprisoned Individuals" OR Inmate\* OR Hostage\* OR "Detained Person" OR "Detained Persons" OR "Ex-Prisoner" OR Prisioneir\* OR Cativ\* OR Detent\* OR Encarcerad\* OR Preso\* OR "Pessoa Privada de Liberdade" OR "Pessoas Privadas de Liberdade" OR "População Privada de Liberdade" OR Detid\* OR Prisioneir\* OR Refém OR Reféns OR Detenid\* OR Encarcelad\* OR "Persona Privada de Libertad" OR "Personas Privadas de Libertad" OR Reclus\* OR Rehenes))

AND

(mh:(I01.240.425.513\* OR N01.224.425.394\* OR N04.590.374.350.500\* OR N05.300.430.383\* OR SP1.852.365\* OR SP2.070.578\* OR SP9.242.315.475.156.606\* OR N01.224.791\* OR N06.850.505.400.800\* OR SP2.070.578.468.322\* OR SP3.311.150\* OR SP5.312.109.495.359\* OR M01.686.477.625.594\* OR M01.686.477.625.188\* OR N01.224.317\* OR SP3.522.561.162.267\* OR I01.076.201.450\* OR I01.880.853.100\* OR SP3.311.900.898.314\* OR F01.145.209.399\* OR L01.559\* OR SP3.311.900.353.100.548.300\* OR N01.824.245\* OR SP2.070.315.420.435.671\* OR SP3.522.233.320\* OR F01.393.446.250\* OR F01.752.747.385.200\* OR F01.752.747.722.200\* OR F02.739.794.793.200\* OR SP3.311.900.353.202.466\* OR K01.844\* OR SP2.070.315.420.754\* OR SP3.311.900.898.314.587\* OR I02\* OR I01.880.853.996\* OR N01.824\* OR SP2.070.315.420.566\* OR SP3.311.900.686.409\* OR SP3.522.233\* OR 01.880.853.375\* OR SP3.311.750.298.366.120\*) OR tw:(Inequit\* OR Inequalit\* OR Disparit\* OR Equit\* OR Equalit\* OR Disadvantage\* OR Desigualdad\* OR Inequalidad\* OR Iniquidad\* OR Inequidad\* OR Disparidad\* OR Equidad\* OR Residenc\* OR "Place of Birth" OR "Birth Place" OR Communit\* OR Residential OR Domicil\* OR Habitação OR Comunidad\* OR "Local de Nascimento" OR Localidade OR Naturalidade OR Vizinhanç\* OR Vivienda OR "Lugar de Nacimiento" OR Vecindario\* OR "Racial Group" OR "Racial Groups" OR Race\* OR "Grupos Raciais" OR Raça\* OR "Grupos Raciales" OR Raza\* OR Ethnicity OR Ethnic OR Etnicid\* OR Etnia\* OR Étnic\* OR Cultur\* OR Customs OR Costume\* OR Costumbre\* OR Language OR Dialect\* OR Idioma OR Dialeto OR Lenguaje OR Employment OR "Occupational Status" OR

"Labor Force" OR "Labor Forces" OR Underemployment OR occupation\* OR Emprego OR Ocupação OR "Status Laboral" OR "Status Ocupacional" OR Empleo OR "Ocupación Laboral" OR Gender OR Gênero OR Religi\* OR Prayer\* OR Educat\* OR Educaç\* OR "Social and Economic Factors" OR "Economic and Social Factors" OR Socioeconomic OR "socio-economic" OR "High Income Population" OR "High-Income Populations" OR "Land Tenure" OR "Standard of Living" OR "Living Standard" OR "Living Standards" OR "Fatores Econômicos e Sociais" OR "Fatores Sociais e Econômicos" OR "Factores Económicos y Sociales" OR "Factores Sociales y Económicos" OR "Social Capital" OR "Social Infrastructure" OR "Social Infrastructures" OR "Capital Social" OR "Infraestrutura Social" OR "Infraestructura Social"))  
AND (db:("LILACS"))
